# Supplementary material for: Production of IL-6 and Phagocytosis Are the Most Resilient Immune Functions in Metabolically Compromised Human Monocytes
Source: PubMed Central journal article supplement (PMC8562108; doi:10.3389/fimmu.2021.730672), 2021-10-19
Supplement: DataSheet_1.pdf [file DataSheet_1.pdf]

*Supplementary Material*

1 Supplementary Figures

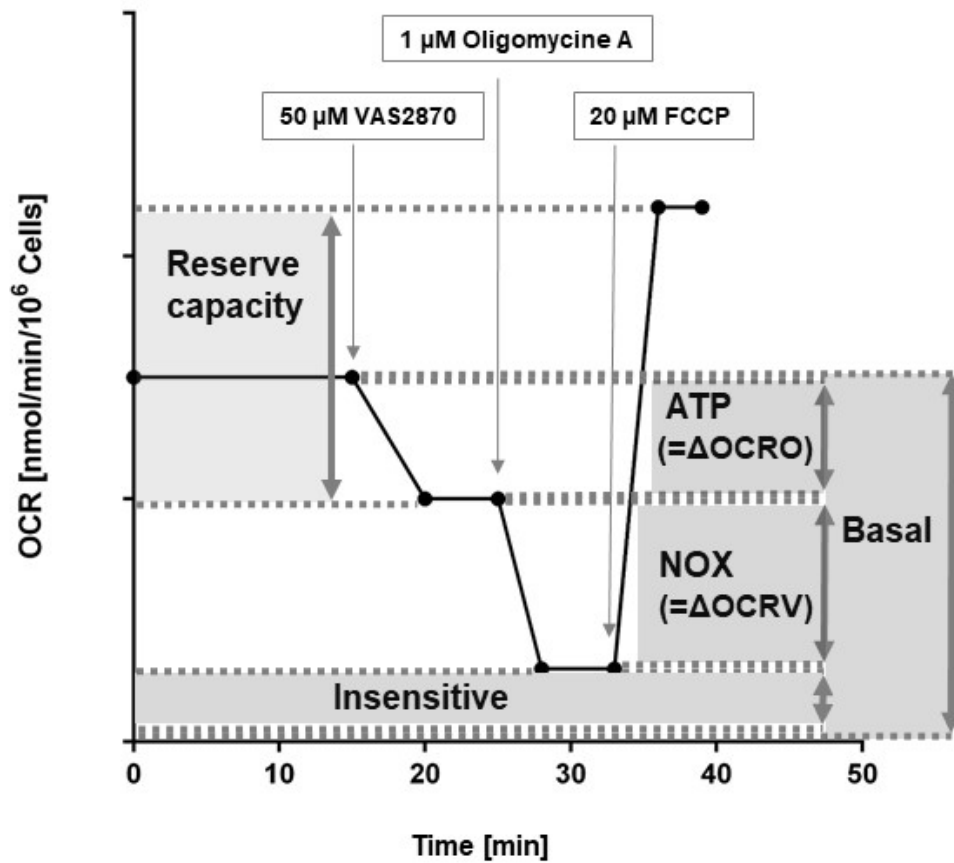

**Supplementary Figure 1.** Time protocol of OCR measurement of human monocytes after 2 and 6h incubation. 50 μM VAS2870 at t=15 min 1 μM Oligomycin A at t= 25 min, 20 μM FCCP at t= 33 min.

Supplementary Material

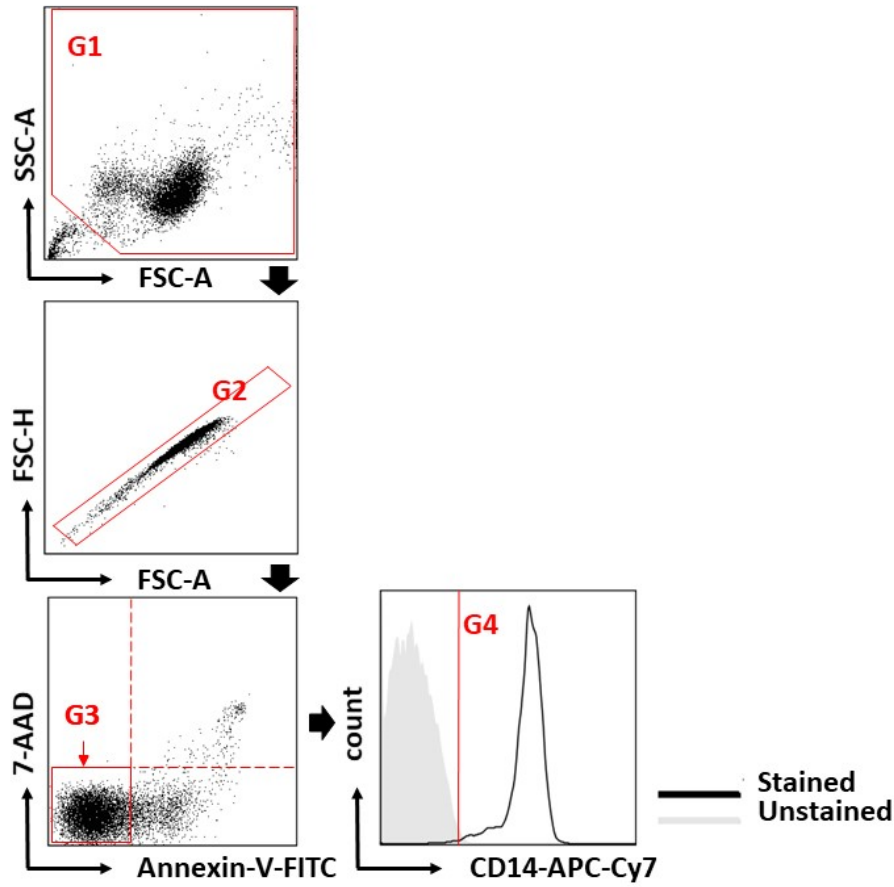

**Supplementary Figure 2.** Gating strategy: Assessment of viability and purity following isolation and/or incubation by flow cytometry. Detritus (FSC/SSC, G1) and cell doublets (FSC-A/FSC-H, G2) were excluded, followed by gating for viability (7-AAD/Annexin-V, G3) and purity (count/CD14, G4).

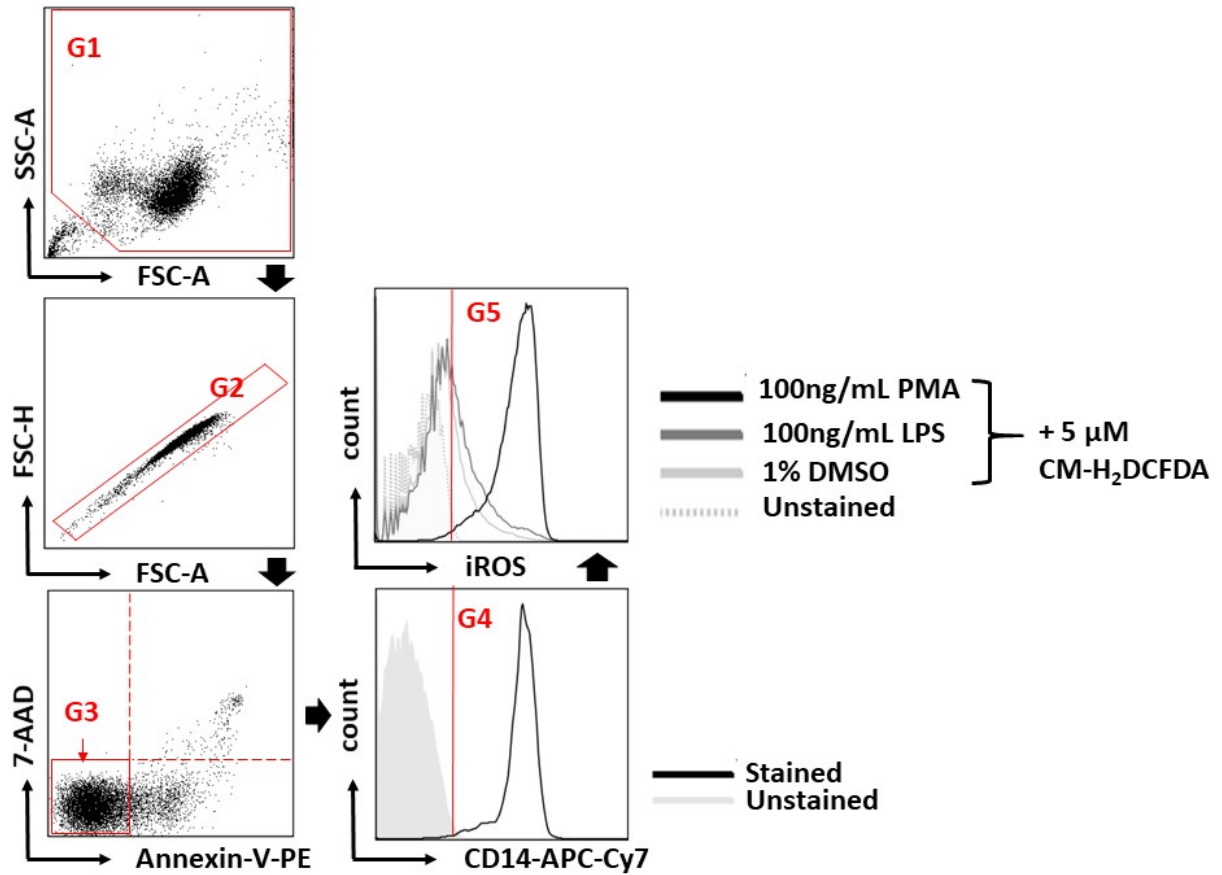

**Supplementary Figure 3.** Gating strategy: Assessment of intracellular reactive oxygen species by flow cytometry. Detritus (FSC/SSC, G1) and cell doublets (FSC-A/FSC-H, G2) were excluded, followed by gating for viable (7-AAD/Annexin-V, G3) and CD14-positive cells (count/CD14, G4). Median fluorescence intensity of cells positive for CM-H<sub>2</sub>DCFDA staining was assessed by G5.

Supplementary Material

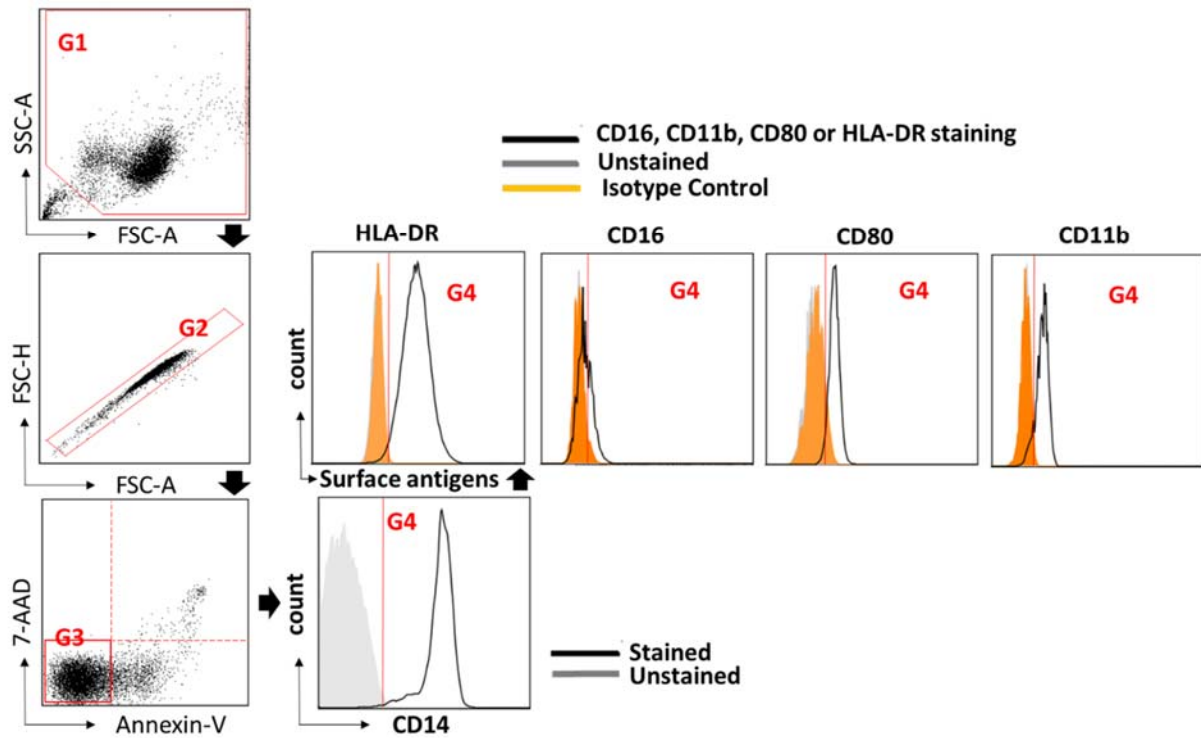

**Supplementary Figure 4.** Gating strategy: Assessment of surface markers of activation by flow cytometry. Detritus (FSC/SSC, G1) and cell doublets (FSC-A/FSC-H, G2) were excluded, followed by gating for viable (7-AAD/Annexin-V, G3) and CD14-positive cells (count/CD14, G4). Median fluorescence intensity (in comparison to isotype control staining) and percentage of cells positive for surface antigen staining was assessed by G5.

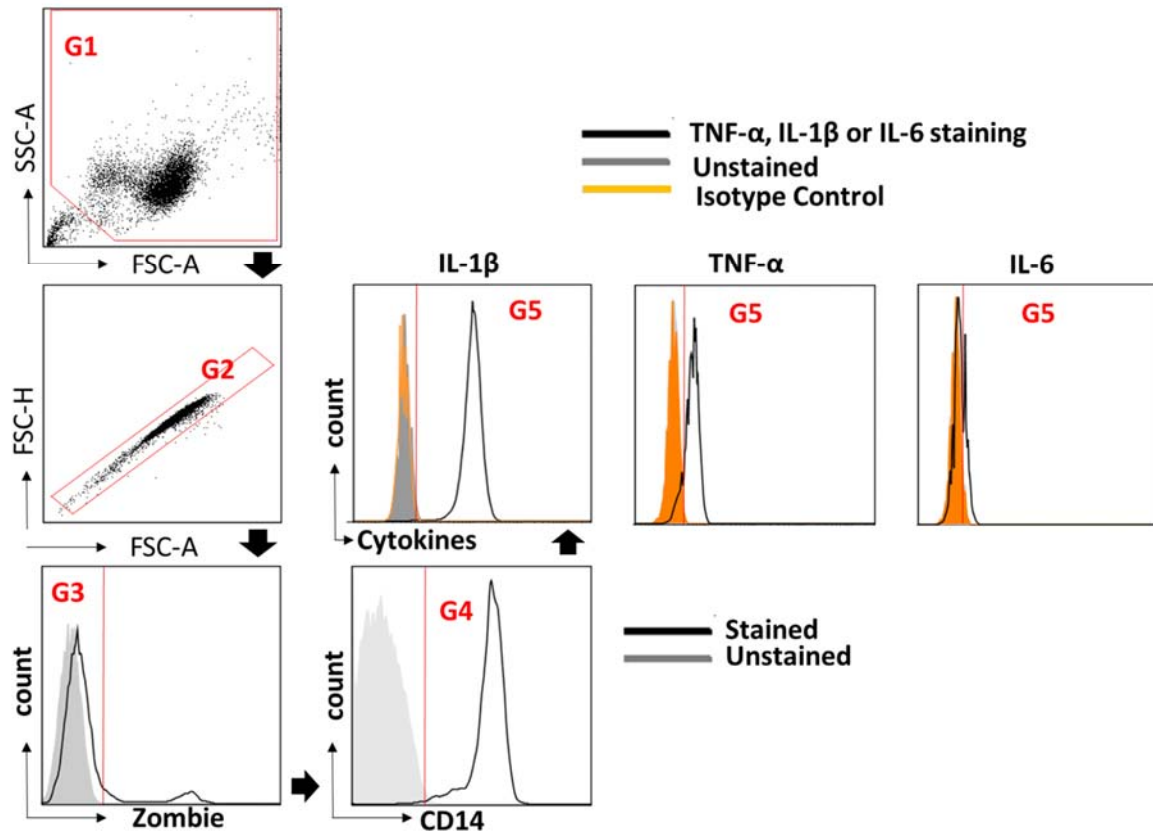

**Supplementary Figure 5.** Gating strategy: Assessment of intracellular cytokines by flow cytometry. Detritus (FSC/SSC, G1) and cell doublets (FSC-A/FSC-H, G2) were excluded, followed by gating for viable (count/Zombie, G3) and CD14-positive cells (count/CD14, G4). Median fluorescence intensity (in comparison to isotype control staining) and percentage of cells positive for intracellular cytokine staining was assessed by G5.
